# Supplementary material for: Prisión y muerte de Carrasco Formuguera: testimonio del escritor Victoriano García Martí, amigo y compañero de cautiverio
Source: Royal Society of Chemistry journal article supplement (doi:10.1039/d3ra02211k), 1988-01-01
Supplement: d3ra02211k1.pdf [file d3ra02211k1.pdf]

## *Supporting Information for*

### **Quantitative evaluation of H-donating abilities of C(sp<sup>3</sup>)-H bonds of nitrogen-containing heterocycles in hydrogen atom transfer reaction**

Yan-Hua Fu,<sup>\*a</sup> Taixuan Jia<sup>a</sup>, Guang-Bin Shen<sup>b</sup> and Xiao-Qing Zhu<sup>c</sup>

<sup>a</sup> *College of Chemistry and Environmental Engineering, Anyang Institute of Technology, Anyang, Henan, 455000, China*

<sup>b</sup> *School of Medical Engineering, Jining Medical University, Jining, Shandong, 272000, P. R. China.*

<sup>c</sup> *The State Key Laboratory of Elemento-Organic Chemistry, College of Chemistry, Nankai University, Tianjin, 300071, China*

*E-mail: 20180031@ayit.edu.cn; gbshen@mail.jnmc.edu.cn; xqzhu@nankai.edu.cn*

|      |                                                                                                                                                              |    |
|------|--------------------------------------------------------------------------------------------------------------------------------------------------------------|----|
| SI   | Kinetic studies of the HAT reactions from C(sp <sup>3</sup> )-H bonds of nitrogen-containing heterocycles and other H-donors to CumO• radical in literatures | S2 |
| SII  | The brief introduction of Applied Photophysics SX.18MV-R stopped-flow                                                                                        | S4 |
| SIII | References                                                                                                                                                   | S5 |

## SI. Kinetic studies of the HAT reactions from C(sp<sup>3</sup>)-H bonds of nitrogen-containing heterocycles and other H-donors to CumO<sup>•</sup> radical in literatures

The second-order rate constants  $k_2$  and activation free energies  $\Delta G^\ddagger_{\text{XH/Y}}$  which were obtained by Eyring equation [ $k_2 = (k_B T/h)\exp(-\Delta G^\ddagger/RT)$ ] of HAT reactions from C(sp<sup>3</sup>)-H bonds of nitrogen-containing heterocycles and other H-donors to CumO<sup>•</sup> radical in acetonitrile (MeCN) at 298 K are listed in Table S1.

**Table S1.** Second-order rate constants ( $k_2$ ), activation free energies ( $\Delta G^\ddagger_{\text{XH/CumO}^\bullet}$ ) of HAT reactions (XH/CumO<sup>•</sup>) and the references in MeCN at 298 K.

| Entry | XH                                                                                  | $k_2$ (M <sup>-1</sup> s <sup>-1</sup> ) <sup>a</sup> | $\Delta G^\ddagger_{\text{XH/CumO}^\bullet}$ (kcal/mol) <sup>b</sup> | Ref. |
|-------|-------------------------------------------------------------------------------------|-------------------------------------------------------|----------------------------------------------------------------------|------|
| 1H    | 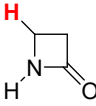   | $3.60 \times 10^5$                                    | 9.87                                                                 | S1   |
| 2H    |    | $2.27 \times 10^6$                                    | 8.78                                                                 | S1   |
| 3H    |   | $4.53 \times 10^6$                                    | 8.37                                                                 | S1   |
| 4H    |  | $4.60 \times 10^6$                                    | 8.36                                                                 | S1   |
| 5H    |  | $2.34 \times 10^6$                                    | 8.76                                                                 | S1   |
| 6H    |  | $3.80 \times 10^6$                                    | 8.47                                                                 | S1   |
| 7H    |  | $1.90 \times 10^6$                                    | 8.88                                                                 | S1   |
| 8H    |  | $2.76 \times 10^6$                                    | 8.66                                                                 | S1   |
| 9H    |  | $3.75 \times 10^6$                                    | 8.48                                                                 | S1   |
| 10H   |  | $8.90 \times 10^5$                                    | 9.33                                                                 | S1   |

|     |                                                                                     |                    |       |    |
|-----|-------------------------------------------------------------------------------------|--------------------|-------|----|
| 11H |    | $2.45 \times 10^6$ | 8.73  | S1 |
| 12H |    | $6.44 \times 10^5$ | 9.52  | S1 |
| 13H |    | $1.14 \times 10^6$ | 9.19  | S1 |
| 14H |    | $9.20 \times 10^6$ | 7.95  | S1 |
| 15H |   | $3.20 \times 10^7$ | 7.21  | S1 |
| 16H |  | $8.90 \times 10^5$ | 9.33  | S1 |
| 17H |  | $2.02 \times 10^6$ | 8.85  | S1 |
| 18H |  | $1.00 \times 10^5$ | 10.63 | S1 |
| 19H |  | $6.00 \times 10^6$ | 8.20  | S1 |
| 20H |  | $4.00 \times 10^4$ | 11.17 | S1 |
| 21H |  | $1.24 \times 10^8$ | 6.41  | S2 |
| 22H |  | $1.91 \times 10^8$ | 6.15  | S2 |

|     |                                                                                   |                    |      |    |
|-----|-----------------------------------------------------------------------------------|--------------------|------|----|
| 23H | 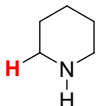 | $1.07 \times 10^8$ | 6.50 | S2 |
| 24H |  | $1.22 \times 10^8$ | 6.42 | S2 |
| 25H |  | $9.54 \times 10^5$ | 9.29 | S3 |
| 26H |  | $1.10 \times 10^6$ | 9.21 | S4 |
| 27H |  | $2.20 \times 10^6$ | 8.80 | S5 |
| 28H |  | $3.20 \times 10^6$ | 8.57 | S6 |

<sup>a</sup> The uncertainty of date is smaller than 5%. <sup>b</sup> The date of  $\Delta G^\ddagger_{\text{XH/Y}}$  are derived from Eyring equation  $k_2 = (k_B T/h) \exp(-\Delta G^\ddagger/RT)$ .

## SII. The brief introduction of Applied Photophysics SX.18MV-R stopped-flow

SX.18MV-R stopped-flow is a fast dynamic measuring device with high sensitivity produced by Applied Photophysics Limited Company. The system has a detection wavelength range of 200 ~ 900 nm and a movable sample cell of 20ul, 5ul and 2ul to suit different determination needs. The Dead-Time of the system is less than 500 us (far less than the Dead-Time of the general stopped-flow device about 4 ms), and the rate constant can be measured up to  $3000 \text{ s}^{-1}$ ; High sensitivity, low noise (0.0001AU); Temperature control range (-20 to 60 °C). RISC OS3.11 operating system, fast and simple, and can directly analyze the dynamics curve to give the corresponding dynamics parameters. The picture of the Applied Photophysics SX.18MV-R stopped-flow is shown below.

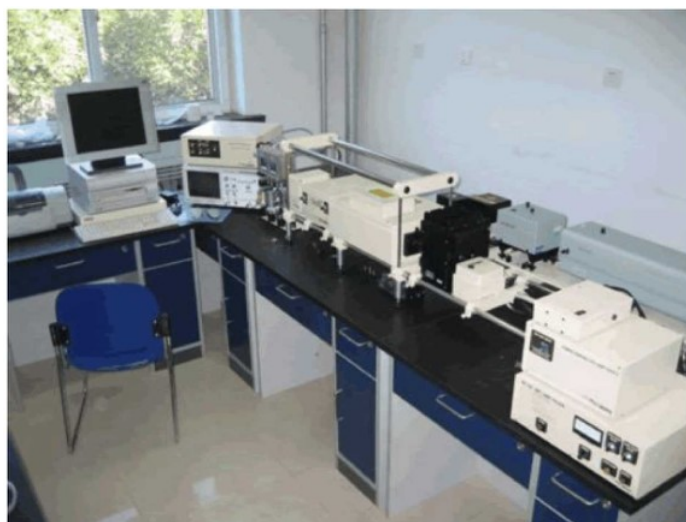

## References

- S1 M. Galeotti, C. Trasatti, S. Sisti, M. Salamone, M. Bietti, *J. Org. Chem.*, 2022, **87**, 7456-7463.
- S2 M. Salamone, R. Martella, M. Bietti, *J. Org. Chem.*, 2012, **77**, 8556-856.
- S3 M. Salamone, Ortega, V. B.; Bietti, M. *J. Org. Chem.*, 2015, **80**, 4710-4715
- S4 M. Bietti, R. Martella, M. Salamone, *Org. Lett.*, 2011, **13**, 6110-6113.
- S5 M. Salamone, M. Galeotti, E. Romero-Montalvo, J. A. v. Santen, B. D. Groff, J. M. Mayer, G. A. DiLabio, M. Bietti, *J. Am. Chem. Soc.*, 2021, **143**, 11759-11776.
- S6 M. Salamone, G. Carboni, M. Bietti, *J. Org. Chem.*, 2016, **81**, 9269-9278.
